# Supplementary material for: Genome-wide association study and genome prediction of tallness trait in spinach tallness phenotyping
Source: Research Square preprint supplement (doi:10.21203/rs.3.rs-6305818/v1), 2025-06-30
Supplement: Supplementary file 2 [file ece420254693f796c23745f0.xlsx]

## Sheet: S.Table1
Supplementary Table S1. List of 307 USDA spinach (Spinacia oleracea) germplasm accessions and their PI accession, name, origin, talleness, cluster, country, and accession number in each country.
PI_ACCESSION	NAME	ORIGIN	Tallness (cM)	3Cluster	Country	Accession NO. in country
PI 200882	Cornell ID #50	Afghanistan	8.8	Q1	Afghanistan	21
PI 207518	Cornell ID #30	Afghanistan	6.8	Q1
PI 211632	Cornell ID #35	Afghanistan	8.3	Q1
PI 212119	Cornell ID #5	Afghanistan	8.5	Q1
PI 212120	Cornell ID #6	Afghanistan	6	Q1
PI 212328	Cornell ID #7	Afghanistan	6.6	Q1
PI 219949	Cornell ID #11	Afghanistan	8	Q1
PI 220121	Palak	Afghanistan	9	Q1
PI 220546	Palek	Baghlān, Afghanistan	5.4	Q1
PI 220686	Palek	Afghanistan	7.5	Q1
PI 223536	Palek	Afghanistan	9.2	Q2
PI 256079	Cornell ID #209	Afghanistan	8.2	Q1
PI 604782	SPI 12/76	Jowzjān, Afghanistan	6.9	Q1
PI 604783	SPI 13/79	Afghanistan	10.3	Q1
PI 604784	SPI 14/79	Afghanistan	7	Q1
PI 604787	SPI 108/79	Jowzjān, Afghanistan	8.7	Q1
PI 604788	SPI 109/93	Afghanistan	8.3	Q1
PI 604789	SPI 110/76	Afghanistan	10	Q1
PI 604790	SPI 111/80	Afghanistan	10	Q2
PI 604791	SPI 114/81	Afghanistan	5.8	Q2
PI 677108	SPI 113/73	Afghanistan	11.2	Q2
PI 167434	Cavallius	Belgium	10.6	Q1	Belgium	11
PI 179588	458	Belgium	7.2	Q1
PI 179589	Giant Spinach	Belgium	9	Q1
PI 179590	452	Belgium	6.3	Q1
PI 179591	451	Belgium	8.9	Q1
PI 179592	455	Belgium	5.6	Q1
PI 179593	450	Belgium	7.2	Q1
PI 179594	445	Belgium	11.5	Q1
PI 179595	Victoria	Belgium	7.5	Q1
PI 179596	449	Belgium	5	Q1
PI 179597	454	Belgium	8.3	Q1
PI 103063	11	Beijing Shi, China	12	Q2	China	16
PI 192945	CGN 9615	China	13	Q1
PI 418978	Chung Pu Lao	Shaanxi Sheng, China	10.5	Q1
PI 419004		China	10.8	Q2
PI 419162	Cornell ID #163	China	11.5	Q1
PI 433207	495	China	11	Q2
PI 433208	496	China	11.5	Q2
PI 433209	497	China	16.1	Q1
PI 433210	498	China	10.6	Q2
PI 433212	500	China	11.2	Q1
PI 478393	Cornell ID #174	China	13.4	Q1
PI 664497	Cornell ID #272	China	13.1	Q1
PI 664498	Cornell ID #273	China	12	Q1
PI 664499	Ex. No. 19	China	12.2	Q1
PI 419218	Cornell ID #164	Hong Kong, China	10.2	Q2
PI 321020	Wushe Waka Maru	Taiwan, China	6.5	Q2
PI 531452	MATADOR DARKO	Denmark	8.5	Q1	Denmark	1
PI 183246	No. 3	Egypt	10.5	Q1	Egypt	3
PI 319220	CGN 14185	Egypt	7.5	Q1
PI 374233	Baladi	Egypt	8.1	Q1
PI 193618	Neusseelander	Ethiopia	7.7	Q1	Ethiopia	2
PI 193619	Victoria	Ethiopia	8	Q1
PI 261787	Monstrueux de Viroflay	France	7.5	Q1	France	5
PI 261788	Geant d&#39;Hiver	France	7	Q1
PI 261789	Giant d&#39;etc.	France	7.9	Q1
PI 360710	Samos Hybrid	France	12.8	Q1
PI 433211	499	France	11	Q2
PI 266926	Universal	Germany	7.5	Q1	Germany	1
PI 263873	Cornell ID #215	Greece	12.2	Q1	Greece	2
PI 491261	WP 106	Greece	9.5	Q1
PI 531448	ESZKIMO	Hungary	9.5	Q1	Hungary	8
PI 531449	HEGYKOI	Hungary	8.6	Q1
PI 531450	KECSKEMETI	Hungary	9.2	Q1
PI 531453	MOHAI	Hungary	12.6	Q1
PI 531454	MOSONMAGYAROVARI	Hungary	6.6	Q1
PI 531455	NAGYIGMANDI	Hungary	7.6	Q1
PI 531456	POPEY	Hungary	9.5	Q1
PI 531457	SZEKESFEHERVARI	Hungary	9.7	Q1
PI 163309	Polag Benaresi	India	8.5	Q1	India	7
PI 165994	Palak	India	11	Q2
PI 174960	Palak	India	7.2	Q2
PI 175312	Palak	India	8.7	Q2
PI 175313	Palak	India	10.6	Q2
PI 181086	Cornell ID #40	India	6.7	Q2
PI 212921	Cornell ID #8	India	6.5	Q2
PI 209644	No. 1	Fārs, Iran	7	Q1	Iran	13
PI 209647	No. 4	Fārs, Iran	9.5	Q1
PI 222270	Esfenaj	Iran	10.8	Q1
PI 222749	Esfenaj	Iran	7.3	Q1
PI 222750	Esfenaj	Iran	10.2	Q1
PI 222838	Esfenaj	Iran	8.3	Q1
PI 224959	Cornell ID #4	Iran	6.3	Q1
PI 226671	Cornell ID #10	Iran	8	Q1
PI 227045	Cornell ID #201	Iran	10.5	Q1
PI 227383	Espinacia	Iran	9.5	Q1
PI 229731	Esfinags	Iran	10.5	Q1
PI 229792	Espinage	Iran	7	Q1
PI 251507	Esfanej	Iran	8.5	Q1
PI 179508	Cornell ID #75	Iraq	9.2	Q1	Iraq	1
PI 176371	Monstrans Viroflag	Italy	10.8	Q1	Italy	2
PI 176372	Lettuce-like leaf	Italy	10	Q1
PI 165710	Cornell ID #247	Japan	9.5	Q2	Japan	5
PI 227230	Jiromaru	Japan	10.5	Q1
PI 604778	New Asia	Hokkaidô, Japan	10.6	Q2
PI 604779	Supahku	Hokkaidô, Japan	8.2	Q1
PI 604780	Yuhparo	Hokkaidô, Japan	9	Q1
PI 217425	Cornell ID #9	Korea, South	10.2	Q1	Korea, South	2
PI 508504	Summer green	Korea, South	12.3	Q2
PI 604785	SPI 161/86	Mongolia	7.3	Q2	Mongolia	1
PI 604786	SPI 62/78	Nepal	8.8	Q1	Nepal	1
PI 699754	HOLLANDIA	Netherlands	8.4	Q1	Netherlands	4
PI 303138	PRINCESS JULIANA	Netherlands	4.5	Q1
PI 360895	Nores	Netherlands	8.1	Q1
PI 606707	AMERICA	North Holland, Netherlands	7	Q1
PI 358248	Ohridski	North Macedonia	8.2	Q1	North Macedonia	18
PI 358249	Kocanski	North Macedonia	7.5	Q1
PI 358250	Kumanovski	North Macedonia	9.2	Q1
PI 358251	Prilepski	North Macedonia	9.2	Q1
PI 358252	Edrolisten	North Macedonia	7.6	Q1
PI 358253	Domasen	North Macedonia	6.7	Q1
PI 358254	Sirokolisten	North Macedonia	9.7	Q1
PI 358257	Struski	North Macedonia	8.8	Q1
PI 358258	Lisicki	North Macedonia	10	Q1
PI 358260	Radoviski	North Macedonia	11.2	Q1
PI 368824	Sirokolisten	North Macedonia	7.7	Q1
PI 370602	Maznolisten	North Macedonia	8	Q1
PI 379547	Veleski	North Macedonia	5.2	Q1
PI 379548	Prilepski	North Macedonia	11.7	Q1
PI 379549	Stipski	North Macedonia	9.5	Q1
PI 379550	Konjsko Rebro	North Macedonia	10	Q3
PI 379551	Krupen	North Macedonia	9.2	Q1
PI 379552	Skopski	North Macedonia	9.3	Q1
PI 274311	Parluk	Pakistan	10	Q2	Pakistan	1
PI 285751	Koda	Warszawa, Poland	7	Q3	Poland	2
PI 535897	OLBRZYM ZIMOWY	Poland	8.1	Q1
PI 379546	Lokalen	Serbia	9.9	Q1	Serbia	1
PI 249920	Espinaca Veroflay	Spain	7.8	Q1	Spain	3
PI 262161	Nostruosa Wireflay	Spain	7.3	Q1
PI 262911	Espinaca nobel	Spain	7.3	Q1
PI 206007	Kingen av Danmark W:s/47	Sweden	9.6	Q1	Sweden	1
PI 179507	Beledi	Syria	7.8	Q1	Syria	8
PI 181808	Beledi	Syria	12.1	Q1
PI 181923	Cornell ID #47	Syria	8	Q1
PI 181964	Homs No. 27	Syria	7.5	Q1
PI 445782	Shami	Syria	7.2	Q1
PI 445783	Shami	Syria	8.5	Q1
PI 445784	Baladi	Syria	13	Q1
PI 445785	Baladi	Syria	6.2	Q1
PI 608762	Cornell ID #271	Thailand	6.5	Q2	Thailand	1
PI 164965	Cornell ID #242	Turkey	8.2	Q1	Turkey	96
PI 164966	Cornell ID #243	Turkey	9.2	Q1
PI 165012	Ispanak Dikenli	Turkey	7.5	Q1
PI 165043	Ispanak	Gaziantep, Turkey	9.5	Q1
PI 167098	Cornell ID #250	Turkey	12.5	Q1
PI 167194	Ispanak	Turkey	9.5	Q1
PI 167195	Ispanak	Gaziantep, Turkey	7.9	Q1
PI 169026	CGN 9499	Turkey	7.2	Q1
PI 169669	Cornell ID #105	Turkey	10.5	Q1
PI 169671	CGN 9500	Burdur, Turkey	11.6	Q1
PI 169673	Cornell ID #106	Aydın, Turkey	8.9	Q1
PI 169674	Dikenli	İstanbul, Turkey	7.4	Q1
PI 169675	Cornell ID #108	Manisa, Turkey	8	Q1
PI 169676	DIKENSIZ	Manisa, Turkey	10	Q1
PI 169677	Cornell ID #110	İzmir, Turkey	8.5	Q1
PI 169678	Cornell ID #111	Hatay, Turkey	9.1	Q1
PI 169680	Cornell ID #113	Kocaeli, Turkey	7.5	Q3
PI 169683	Harlan 2553	Kırklareli, Turkey	6.7	Q1
PI 169684	Harlan 2798	Turkey	10.7	Q1
PI 169685	Cornell ID #115	Balıkesir, Turkey	8	Q1
PI 169686	Harlan 3192	Balıkesir, Turkey	7.8	Q1
PI 169690	Dikensiz	Kocaeli, Turkey	12.3	Q1
PI 171859	Harlan 6725	Samsun, Turkey	10.5	Q1
PI 171860	Dikensiz	Samsun, Turkey	9	Q1
PI 171862	Dikensiz	Tokat, Turkey	8.3	Q1
PI 171863	Dikenli	Tokat, Turkey	9.9	Q3
PI 171864	Harlan 6920	Tokat, Turkey	9	Q1
PI 171865	Cornell ID #76	Trabzon, Turkey	9.7	Q1
PI 171866	Dikenli	Kars, Turkey	10	Q1
PI 173122	Dikenli	Turkey	10.7	Q1
PI 173123	Cornell ID #80	Kars, Turkey	9.2	Q1
PI 173124	Cornell ID #81	Van, Turkey	6.1	Q1
PI 173125	Cornell ID #82	Mardin, Turkey	6.3	Q2
PI 173126	Dikensiz	Urfa, Turkey	9.1	Q1
PI 173127	Cornell ID #83	Maras, Turkey	8.6	Q1
PI 173128	Cornell ID #84	Maras, Turkey	9.4	Q3
PI 173129	Cornell ID #85	Maras, Turkey	10.5	Q1
PI 173130	Cornell ID #86	Malatya, Turkey	9.5	Q3
PI 173131	Cornell ID #87	Malatya, Turkey	11.1	Q1
PI 173809	Cornell ID #88	Malatya, Turkey	8.5	Q3
PI 174383	Cornell ID #90	Turkey	7.1	Q1
PI 174384	Cornell ID #91	Van, Turkey	7.2	Q1
PI 174385	Cornell ID #92	Diyarbakır, Turkey	8.2	Q3
PI 174386	Cornell ID #93	Mardin, Turkey	9.9	Q1
PI 174387	KUZU	Gaziantep, Turkey	9	Q1
PI 174388	Dikensiz	Elazığ, Turkey	9	Q1
PI 174389	Cornell ID #96	Turkey	11.5	Q1
PI 175595	Cornell ID #100	Turkey	7.6	Q1
PI 175924	Cornell ID #52	Turkey	9.7	Q1
PI 175925	Cornell ID #53	Turkey	7.8	Q1
PI 175926	Cornell ID #54	Kocaeli, Turkey	8.5	Q1
PI 175927	Cornell ID #55	Yozgat, Turkey	8.6	Q3
PI 175928	Harlan 9061	Yozgat, Turkey	10.7	Q1
PI 175929	Harlan 8866	Erzincan, Turkey	10.4	Q1
PI 175930	Cornell ID #61	Kırşehir, Turkey	8	Q1
PI 175931	Harlan 9132	Turkey	8.9	Q1
PI 175932	Harlan 9148	Kayseri, Turkey	8.4	Q1
PI 176769	Cornell ID #63	Erzincan, Turkey	9.5	Q1
PI 176770	Cornell ID #64	Erzincan, Turkey	9.5	Q1
PI 176771	Cornell ID #65	Sivas, Turkey	10.4	Q1
PI 176772	Cornell ID #56	Niğde, Turkey	9.3	Q1
PI 176773	Cornell ID #57	Turkey	8.3	Q1
PI 176774	Cornell ID #58	Konya, Turkey	11.4	Q1
PI 176775	Harlan 9430	Turkey	10.2	Q1
PI 176776	Cornell ID #59	Turkey	9.5	Q1
PI 176777	Cornell ID #60	Bilecik, Turkey	11.8	Q1
PI 176779	Cornell ID #67	Turkey	8.5	Q1
PI 176780	Cornell ID #68	Eskişehir, Turkey	13	Q1
PI 177081	Cornell ID #69	Tekirdağ, Turkey	9.4	Q1
PI 177082	Alman	Kayseri, Turkey	9.6	Q1
PI 177557	Cornell ID #71	Ankara, Turkey	16.2	Q1
PI 177558	Harlan 4403	Turkey	14.5	Q1
PI 179041	Cornell ID #72	Zonguldak, Turkey	7.1	Q1
PI 179043	Cornell ID #74	Eskişehir, Turkey	8.1	Q1
PI 179044	Harlan 9665	Çankırı, Turkey	12.5	Q1
PI 179509	Kuzukalak	Bursa, Turkey	7.7	Q1
PI 204632	Cornell ID #16	Sivas, Turkey	6.7	Q1
PI 204732	CGN 14210	Turkey	11.5	Q1
PI 204733	Cornell ID #17	Turkey	10.1	Q1
PI 204734	Cornell ID #18	Turkey	10.9	Q3
PI 204735	Cornell ID #19	Turkey	7.8	Q3
PI 204736	CGN 9622	Turkey	10.1	Q3
PI 205231	Cornell ID #20	Turkey	7.9	Q1
PI 205232	Cornell ID #21	Turkey	7.3	Q1
PI 205233	Cornell ID #22	Turkey	10	Q1
PI 205235	Cornell ID #24	Turkey	8	Q1
PI 206473	Cornell ID #26	Turkey	8.1	Q1
PI 206474	Cornell ID #27	Turkey	10	Q1
PI 206475	Cornell ID #28	Antalya, Turkey	8.5	Q1
PI 206753	Cornell ID #29	Turkey	6.8	Q1
PI 209646	No. 3	Turkey	5	Q1
PI 339545	101-2	Turkey	10.3	Q2
PI 339546	101-5	Turkey	6	Q1
PI 339547	101-9	Turkey	8	Q1
PI 339548	101-25	Turkey	9.8	Q1
PI 449353	Universal	Turkey	10.5	Q1
PI 274051	Matador Improved	United Kingdom	9.7	Q1	United Kingdom	1
PI 699774	Cornell ID #239	Oregon, United States	6.7	Q1	United States	52
PI 699776	Cornell ID #240	California, United States	8.5	Q1
PI 699777	Cornell ID #241	California, United States	9.5	Q1
PI 699778	99 X 95 (DESSERT)	Oregon, United States	6.3	Q1
PI 699755	BADGER SAVOY	California, United States	6.9	Q1
PI 699756	SAVOY SUPREME	Wisconsin, United States	8.2	Q1
PI 699757	RESISTOFLAY	Michigan, United States	7	Q1
PI 699761	TROUBADOR/TEMPO	Oregon, United States	7	Q1
PI 699762	FLANDERS	Louisiana, United States	5.4	Q1
PI 699763	LONG STANDING BLOOMSDALE	New York, United States	8.1	Q1
PI 699764	HASTINGS ARAGON	Georgia, United States	8.5	Q1
PI 699765	VIRGINIA SAVOY	Michigan, United States	7.9	Q1
PI 699766	VIROFLAY 99 MR	California, United States	7.5	Q1
PI 699734	DIXIE MARKET	Maryland, United States	11	Q1
PI 699735	WISCONSIN BLOOMSDALE	New York, United States	7	Q1
PI 699736	KING OF DENMARK	Illinois, United States	8.2	Q1
PI 699737	GIANT THICK LEAVED/NOBEL	California, United States	7.2	Q1
PI 699738	DARK GREEN PRICKLY SEEDED	California, United States	6	Q1
PI 699740	BADGER SAVOY 751	New York, United States	8.5	Q1
PI 699741	BLIGHT RESISTANT SAVOY	New York, United States	5	Q1
PI 699742	BLOOMSDALE DARK GREEN	Missouri, United States	8.1	Q1
PI 699743	BLOOMSDALE LONG STANDING	Pennsylvania, United States	7	Q1
PI 699744	VIKING	New York, United States	7.9	Q1
PI 699745	VIKING GIANT NOBEL	Illinois, United States	7.1	Q1
PI 699746	VIRGINIA BLIGHT-RESISTANT	Pennsylvania, United States	7.6	Q1
PI 699747	VIRAFLAG	Missouri, United States	8.4	Q1
PI 699748	VA SAVOY BLIGHT RESISTANT	Missouri, United States	8	Q1
PI 699749	NORTHLAND	Minnesota, United States	6.5	Q1
PI 699750	NORFOLK SAVOY/BLOOMSDALE	Virginia, United States	9	Q1
PI 699751	NOBEL/GIANT THICK LEAVED	Pennsylvania, United States	9	Q1
PI 699752	OLD DOMINION	Washington, United States	10	Q1
PI 699767	ADVANCE	Oregon, United States	7.2	Q1
PI 699768	INDURES	New York, United States	9	Q1
PI 699770	DUET	Maryland, United States	9.9	Q1
PI 699772	WINTER BLOOMSDALE	New York, United States	7.3	Q1
PI 699773	Bloomsdale Long Standing	Oregon, United States	7.6	Q1
PI 648950	Dixie Savoy	Maryland, United States	9.2	Q1
PI 648951	Cornell ID #275	Maryland, United States	9	Q1
PI 648952	Cornell ID #276	Maryland, United States	9.5	Q1
PI 648953	Cornell ID #277	Maryland, United States	8	Q1
PI 648954	Cornell ID #278	Maryland, United States	10.1	Q1
PI 648955	Cornell ID #279	Maryland, United States	8.5	Q1
PI 648956	Cornell ID #280	Maryland, United States	10.3	Q1
PI 648957	76 X 71	Maryland, United States	7.5	Q1
PI 648958	Cornell ID #286	Maryland, United States	9	Q1
PI 648959	Cornell ID #287	Maryland, United States	9.1	Q1
PI 648960	Cornell ID #288	Maryland, United States	9	Q1
PI 648961	224 X 223	Maryland, United States	7.6	Q1
PI 648962	5 X 1	Maryland, United States	10.5	Q1
PI 648963	Cornell ID #289	Maryland, United States	12.7	Q1
PI 648964	CALIFLAY	California, United States	7.9	Q1
PI 648965	Cornell ID #238	Maryland, United States	8.1	Q1
PI 184137	No. 242		8	Q1	N	17
PI 274042	Best of All		6	Q1
PI 274044	Early Giant		8.8	Q1
PI 274046	Elsoms 23		7	Q1
PI 274047	Elsoms 23 X Troubadour		8.8	Q1
PI 274048	Giant Early Leaf		7.1	Q1
PI 274049	HAMMENHOGS VINTER		7.5	Q1
PI 274050	Hiemalis		6.9	Q1
PI 274052	Nobell II		6.5	Q1
PI 274053	Noorman		6.5	Q1
PI 274055	Noorman Viking		8.4	Q1
PI 274056	Proloog		9.8	Q1
PI 274057	Stamef		12.4	Q1
PI 274058	Summer Savoy		7.6	Q1
PI 274059	Supra		5.7	Q1
PI 274061	Viking		8.4	Q1
PI 274063	Viking		8.9	Q1

## Sheet: S.Table2 
Supplementary Table S2. Prediction accuracy (PA, r-value) for the tallness trait using ten different SNP sets, ranging from r6 (6-SNP set) to all.15058SNPs (all 15,058-SNP set), along with six GWAS-derived SNP marker sets. Prediction was performed through cross-population analysis using seven genomic prediction (GP) models: BA, BB, BL, BRR, rrBLUP, RF, and SVM.
GP	SNP set	BA	BB	BL	BRR	rrBLUP	RF	SVM	Mean (SNP.set)
r-value (100 average)	r6	0.12012	0.0407994	0.121323	0.120641	0.0974593	0.0382206	0.0268012	0.0807664
	r50	0.101348	0.0575821	0.105503	0.0876337	0.0861376	0.0918794	0.115425	0.0922155
	r100	0.124857	0.110543	0.153974	0.121445	0.096687	0.110014	0.112729	0.118607
	r200	0.136491	0.130111	0.170745	0.145408	0.0934464	0.135689	0.132315	0.134887
	r500	0.0659471	0.0695988	0.0660091	0.0722638	0.117701	0.152428	0.162481	0.100918
	r1000	0.162767	0.164374	0.162561	0.148657	0.126744	0.159364	0.180072	0.157791
	r2000	0.166342	0.145866	0.15919	0.139766	0.141661	0.159003	0.15866	0.152927
	r5000	0.114935	0.109835	0.130154	0.12656	0.153636	0.171325	0.183785	0.141461
	r10000	0.127142	0.0900115	0.13661	0.118293	0.154853	0.173284	0.186873	0.141009
	all.15058SNPs	0.116324	0.135162	0.122026	0.163514	0.156214	0.168847	0.19747	0.151365
	Mean (Model)	0.123627	0.105388	0.132809	0.124418	0.122454	0.136005	0.145661	0.127195
GP	SNP set	BA	BB	BL	BRR	rrBLUP	RF	SVM	Mean (SNP.set)
SE	r6	0.0106389	0.0126797	0.0122263	0.0114746	0.0100584	0.012599	0.012239	0.0117023
	r50	0.0135097	0.0127698	0.0111604	0.0119514	0.010782	0.0133154	0.0132569	0.0123922
	r100	0.0107019	0.0122072	0.0118542	0.0129299	0.0109482	0.0128533	0.0114849	0.0118542
	r200	0.0111013	0.0101189	0.0113901	0.0107784	0.0115063	0.0130951	0.0131464	0.0115909
	r500	0.012635	0.0122207	0.0128133	0.0115466	0.0117778	0.0116179	0.0116106	0.0120317
	r1000	0.00948096	0.0107633	0.00993804	0.0125977	0.0120953	0.010666	0.0127581	0.0111856
	r2000	0.0122915	0.0101787	0.0104078	0.0125566	0.0122825	0.0106565	0.0117933	0.0114524
	r5000	0.0102927	0.0121736	0.00999001	0.0108527	0.0118614	0.010947	0.0104462	0.0109377
	r10000	0.0118155	0.0120835	0.0117408	0.0115467	0.011778	0.0109831	0.0123434	0.0117558
	all.15058SNPs	0.0113378	0.0111631	0.0108686	0.0100212	0.0118208	0.011107	0.0119778	0.0111852
	Mean (Model)	0.0113805	0.0116358	0.011239	0.0116256	0.0114911	0.011784	0.0121056	0.0116088
GP	SNP set	BA	BB	BL	BRR	rrBLUP	RF	SVM	Mean (SNP.set)
r-value	m6	0.514939	0.505247	0.511199	0.53116	0.504227	0.435464	0.413878	0.488016
SE	m6	0.00916524	0.0104539	0.00996316	0.0094279	0.00956745	0.00914092	0.00956933	0.00961256

## Sheet: S.Table3
Supplementary Table S3. Prediction accuracy (PA) for tallness using GWAS-derived SNP markers
GWAS.model	Fold	GP	r-Value						SE
			RF	BA	BB	BL	BRR	Mean for each GWAS.GP set	RF	BA	BB	BL	BRR	Mean for each GWAS.GP set
Four models (Glm,Mlm,FarmCPU, and Blink) in gapit3	5fold	Across_prediction	0.098178	0.121607	0.124113	0.124976	0.120926	0.11796	0.00162293	0.00025943	0.000686766	0.000279274	0.000254691	0.000620617
	all	Cross_prediction	0.46642	0.529746	0.502798	0.532256	0.537733	0.513791	0.00574064	0.00432135	0.00429527	0.00388096	0.00392076	0.0044318
	5fold	Cross(self)_prediction	0.457109	0.584192	0.564878	0.578366	0.5825	0.553409	0.0105877	0.00932321	0.00894967	0.00847556	0.0101897	0.00950518
* Genomic Prediction (GP) (r-value) for Tallness Using GWAS-Derived SNP Markers: First, perform GWAS using the GLM, MLM, FarmCPU, and BLINK models in GAPIT3 with five-fold cross-validation. Then, select associated SNPs with a LOD score (-log(P)) > 4.0 from the four models and use them to run the GP model 100 times, calculating GEBVs and estimating the average r-value each time. Repeat this proces…
